# Supplementary material for: Vapour–liquid–solid-like growth of high-quality and uniform 3C–SiC heteroepitaxial films on α-Al2O3(0001) substrates
Source: Royal Society of Chemistry journal article supplement (doi:10.1039/d0ce01793k), 2021-01-01
Supplement: d0ce01793k1.pdf [file d0ce01793k1.pdf]

# Vapour-liquid-solid-like growth of high-quality and uniform 3C-SiC heteroepitaxial films on $\alpha$ -Al<sub>2</sub>O<sub>3</sub>(0001) substrates

Naoki Sannodo,<sup>a</sup> Asuka Osumi,<sup>a</sup> Kenichi Kaminaga,<sup>a</sup> Shingo Maruyama<sup>a</sup> and Yuji Matsumoto<sup>\*a</sup>

<sup>a</sup> Department of Applied Chemistry, Tohoku University, Sendai, 980-8579, Japan.

\*Corresponding authors

## Supporting information

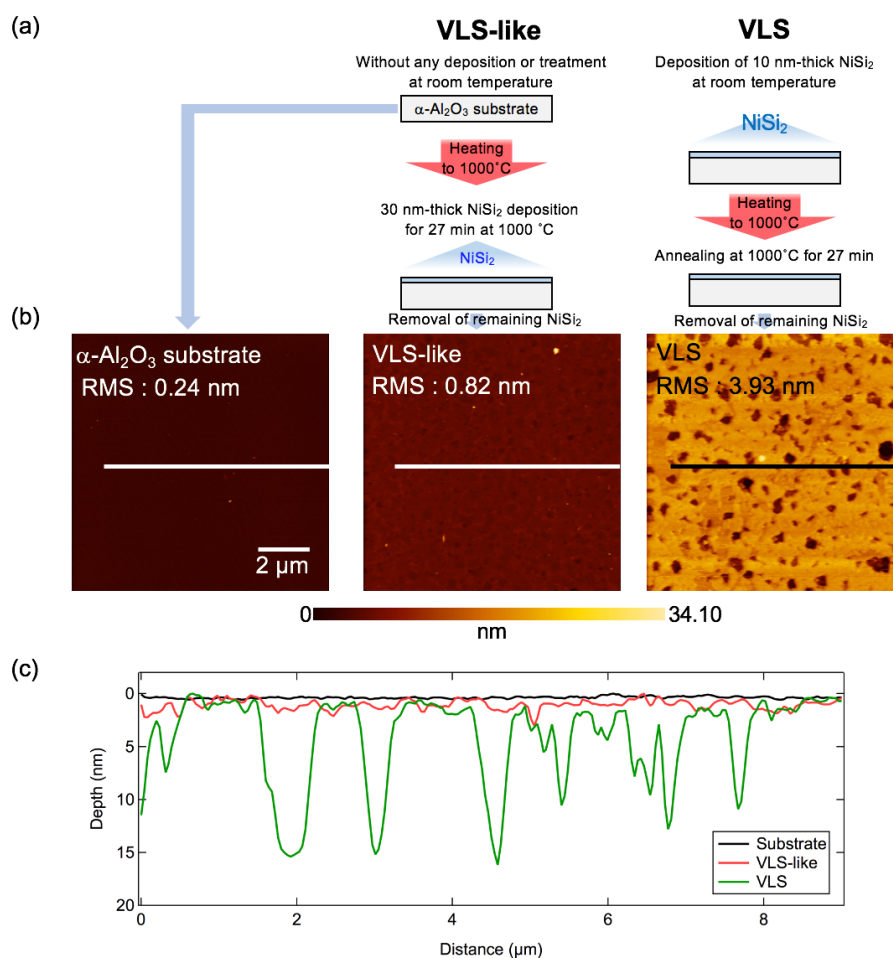

**Fig. S1** (a) Schematic illustrations of the fabrication procedure for surface-etched  $\alpha$ -Al<sub>2</sub>O<sub>3</sub> substrate. The procedure on the left and right assumes substrate etching with VLS-like growth and VLS growth, respectively. (b) A set of AFM images for each sample. (c) Cross-sectional profiles along the black lines that are inserted in (b).

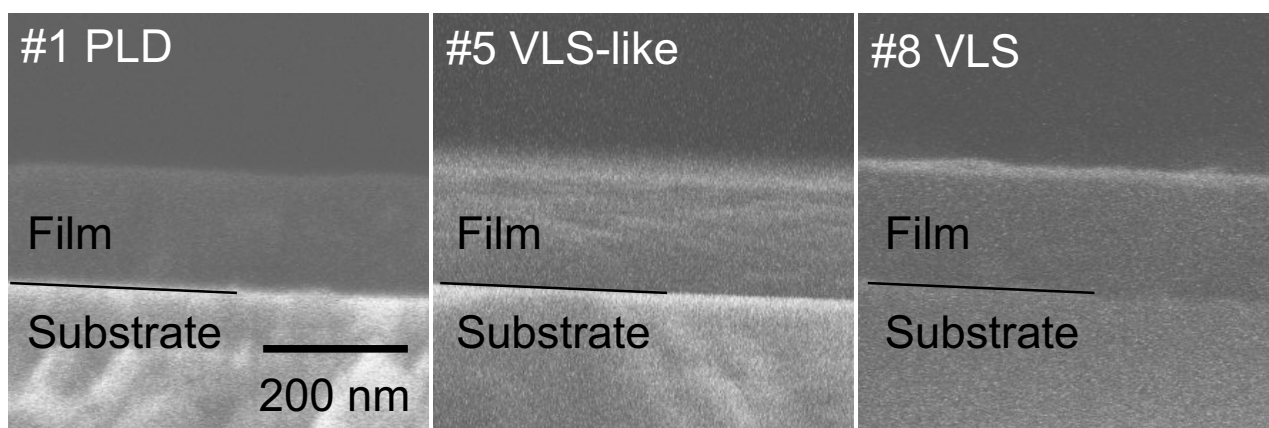

**Fig. S2** Cross-sectional SEM images for the sample #1, #5 and #8.

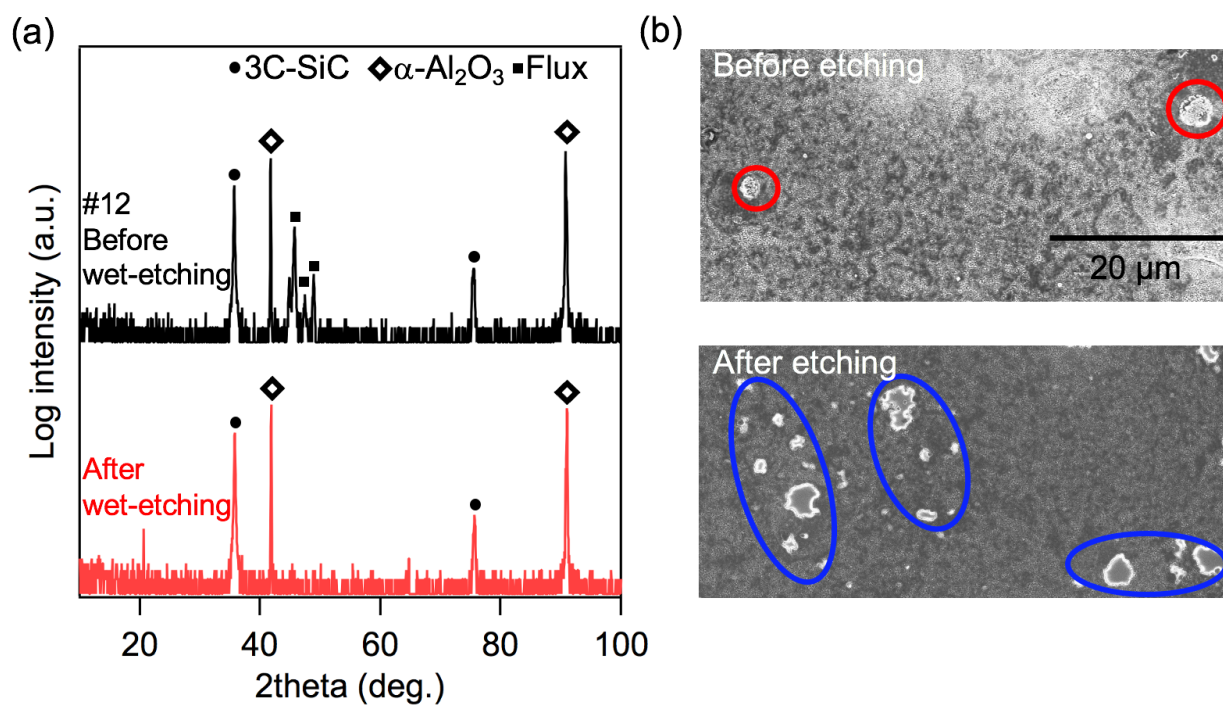

**Fig. S3** Set of XRD  $2\theta$  patterns (a) and SEM images (b) for the sample #12 taken before and after wet-etching. In the SEM images, there are some precipitates, enclosed with the red lines, on the surface before the wet-etching, while the traces of precipitates, enclosed with the blue lines, are found after the wet etching.

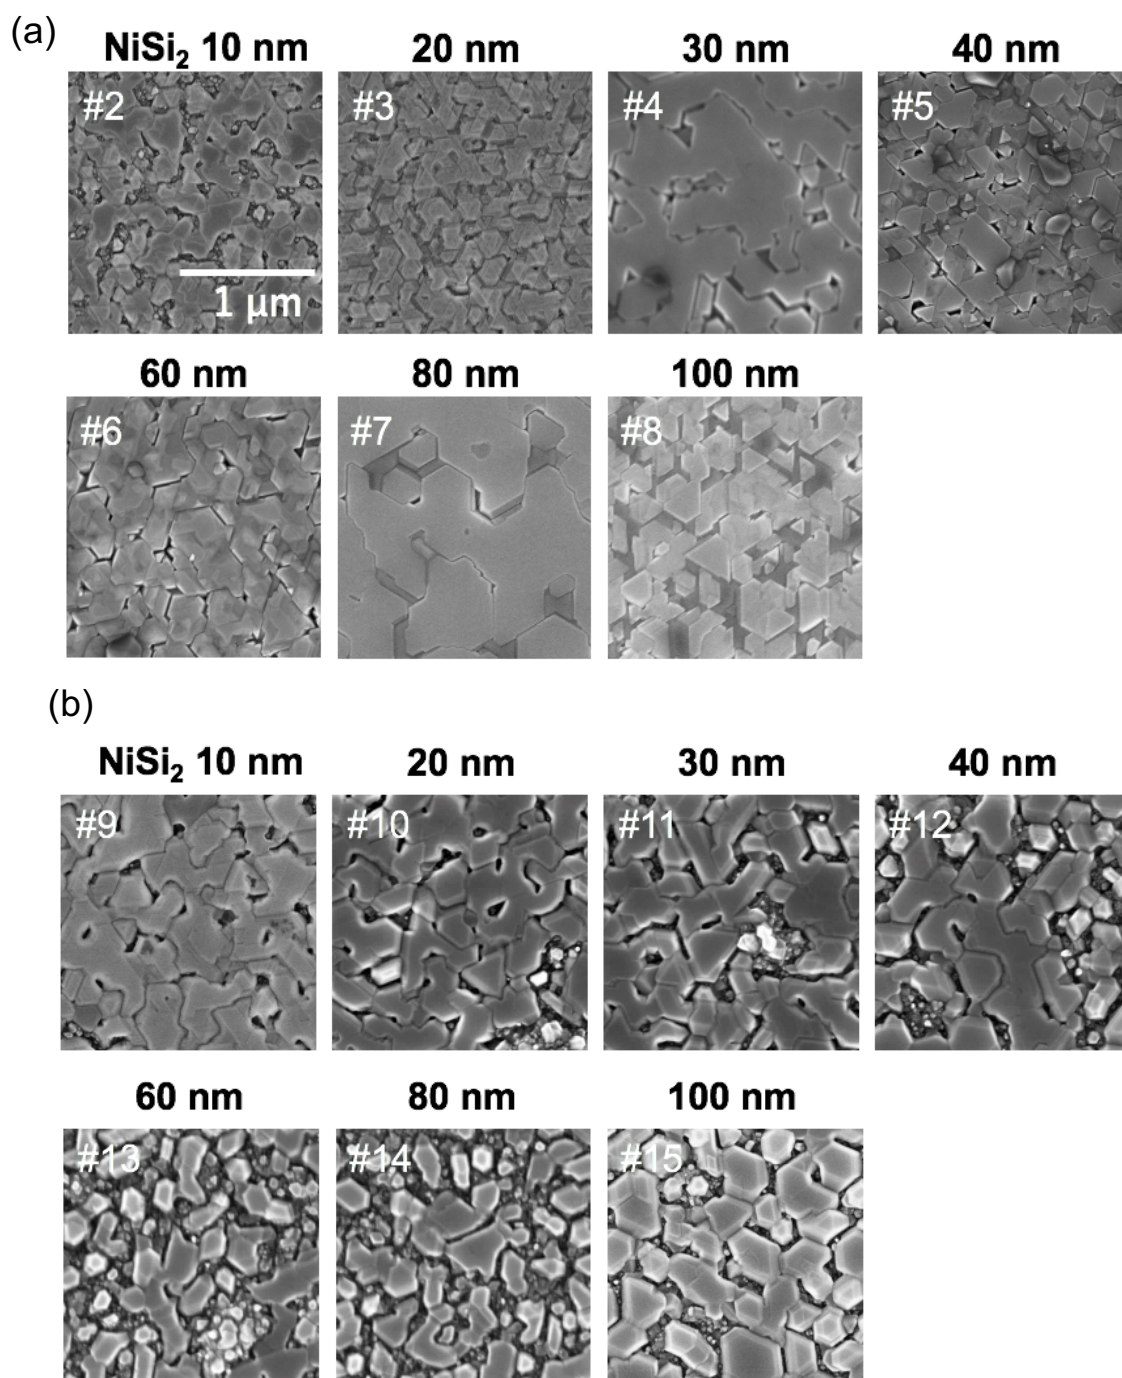

**Fig. S4** Set of SEM images of the SiC film samples #2~#15.

(a) the VLS-like grown SiC films (#2~#8) and (b) the VLS grown SiC films (#9~#15).

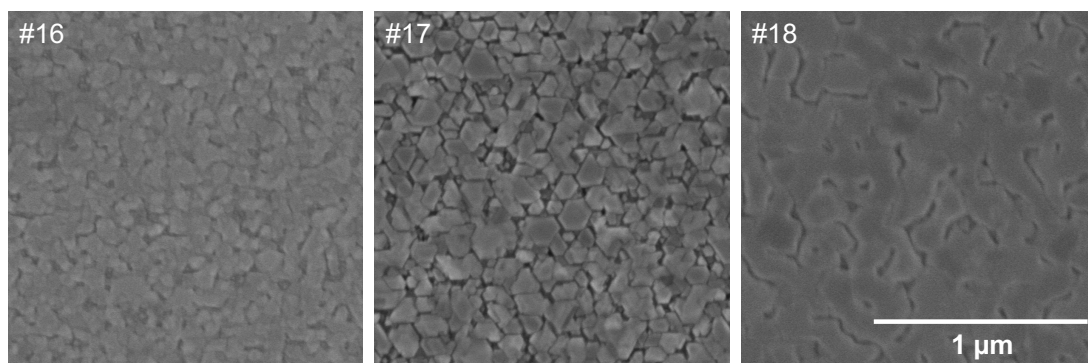

**Fig. S5** SEM images for the VLS-like grown SiC films #16, #17 and #18.
